# Supplementary material
Source: PubMed Central journal article supplement (PMC4391197)

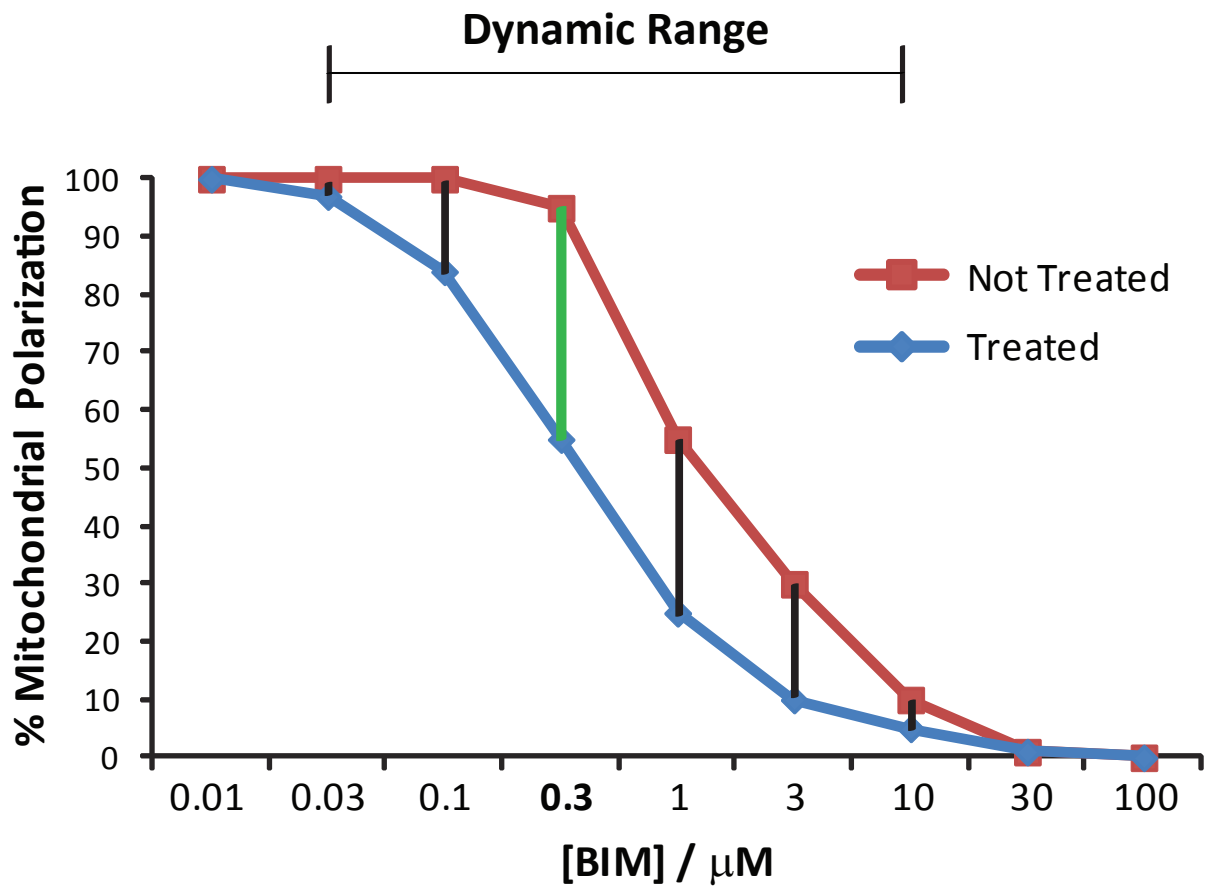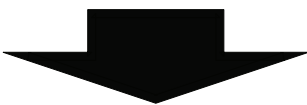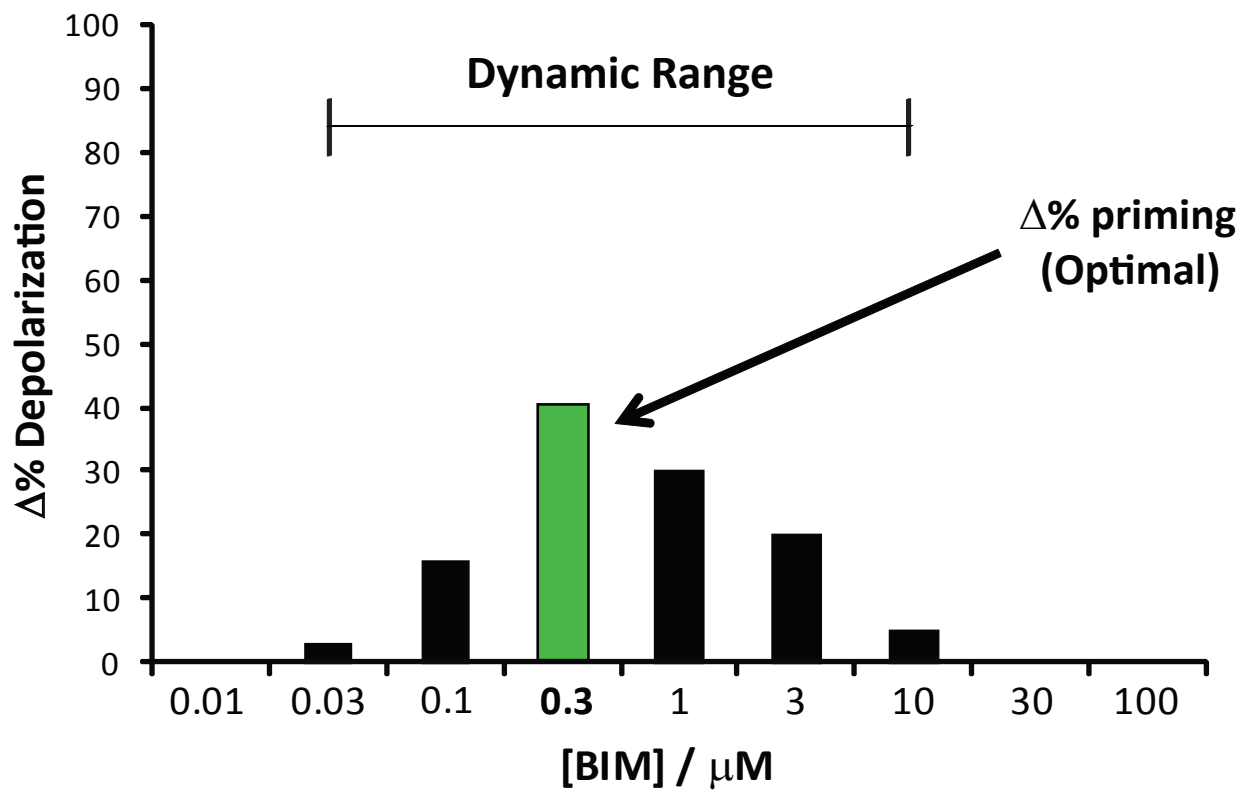

Supplement: NIHMS665124-supplement-1.pdf [file NIHMS665124-supplement-1.pdf]

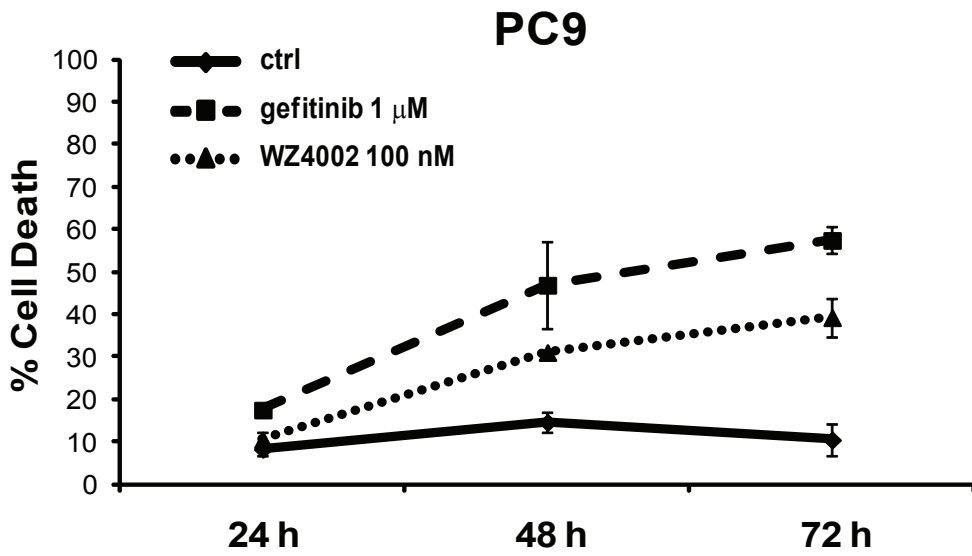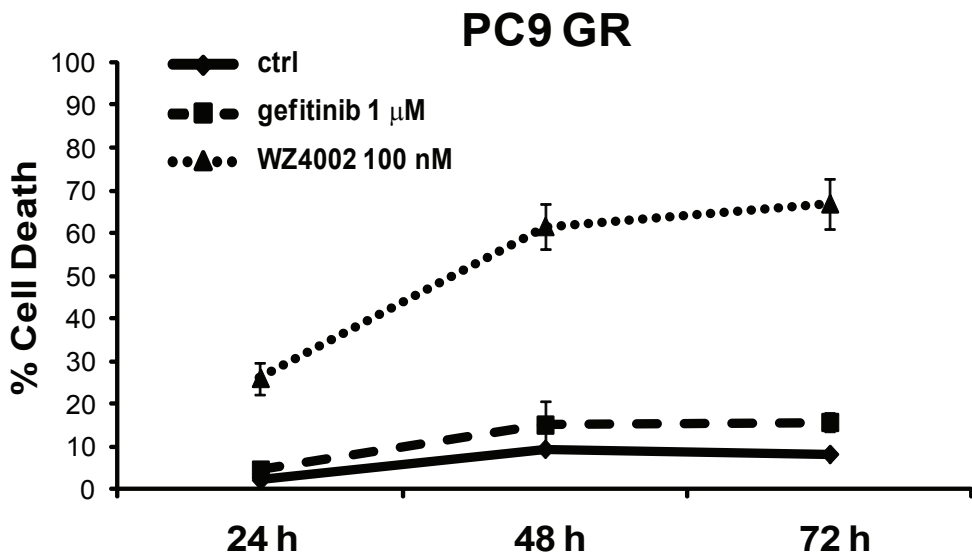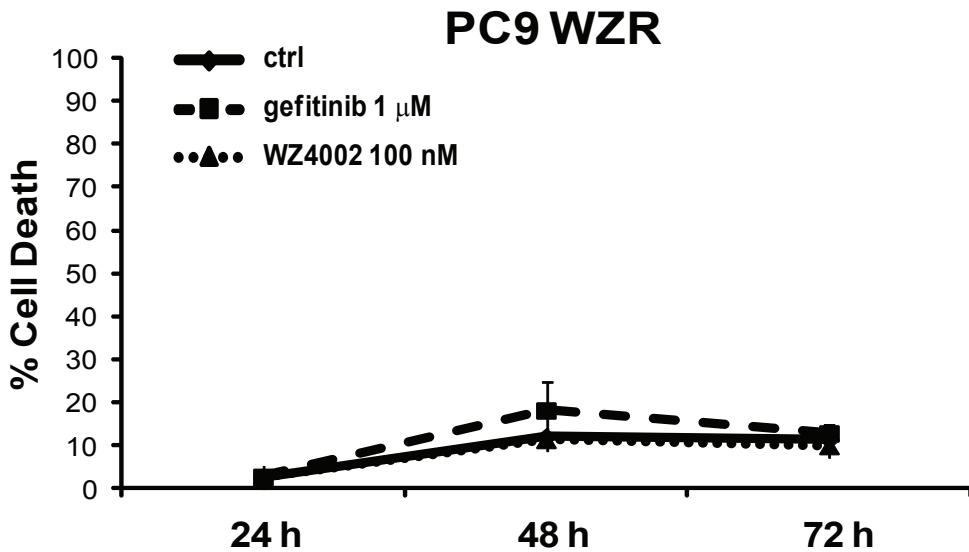

Supplement: NIHMS665124-supplement-2.pdf [file NIHMS665124-supplement-2.pdf]

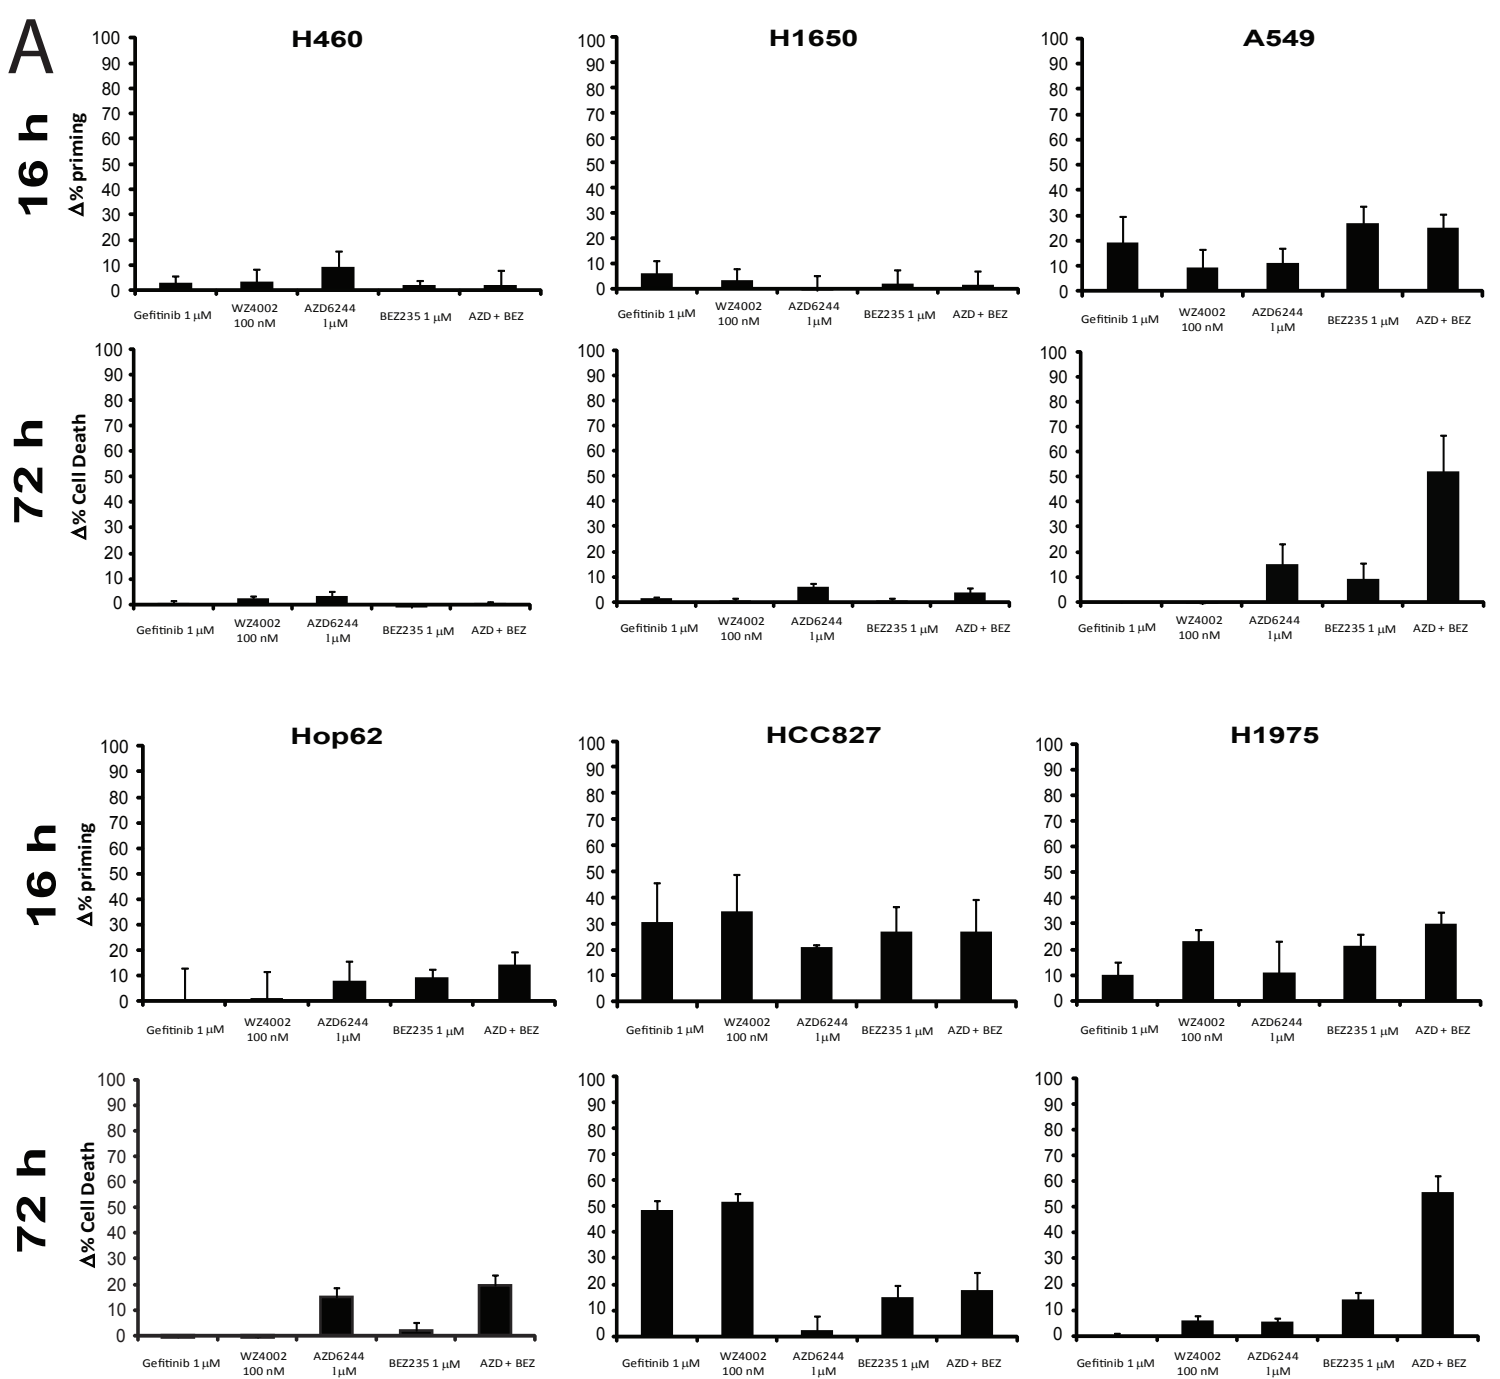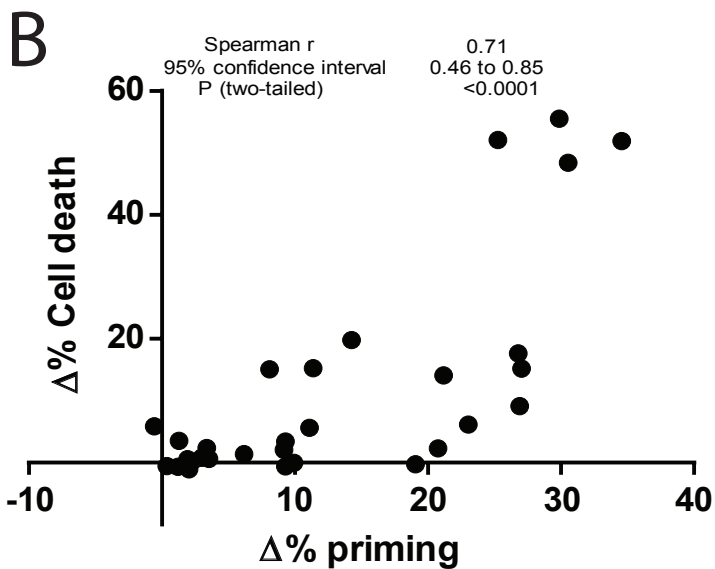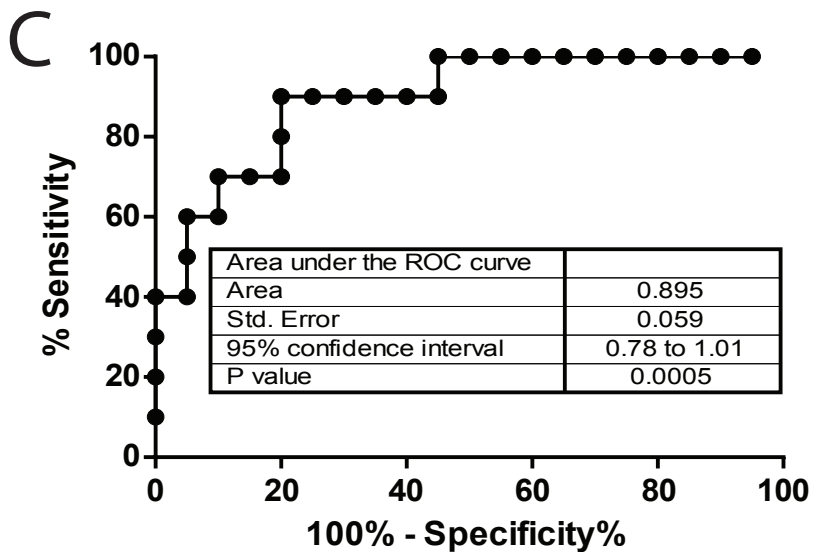

Supplement: NIHMS665124-supplement-3.pdf [file NIHMS665124-supplement-3.pdf]

**A**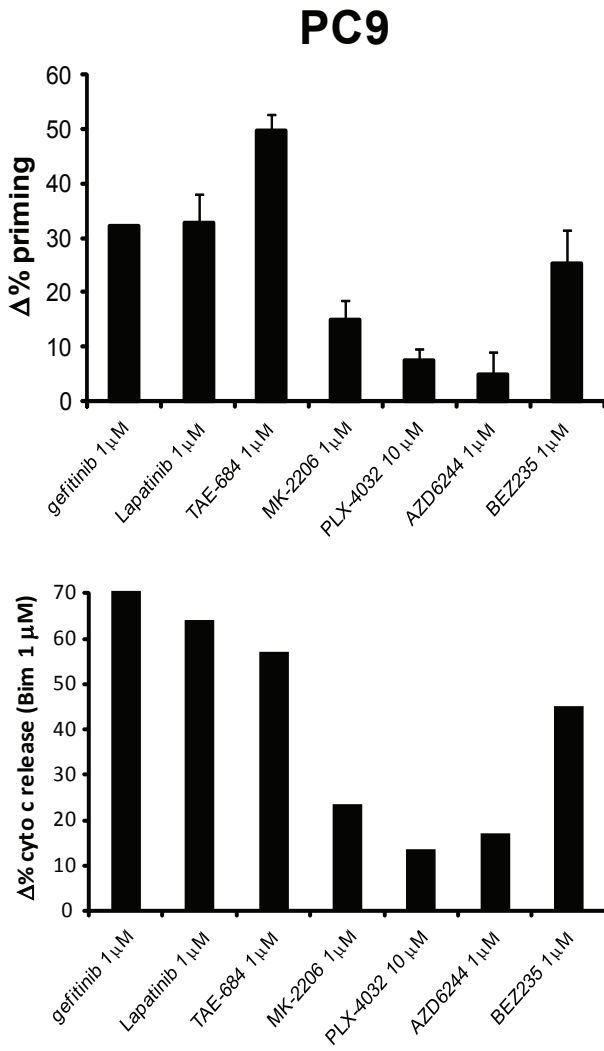**B**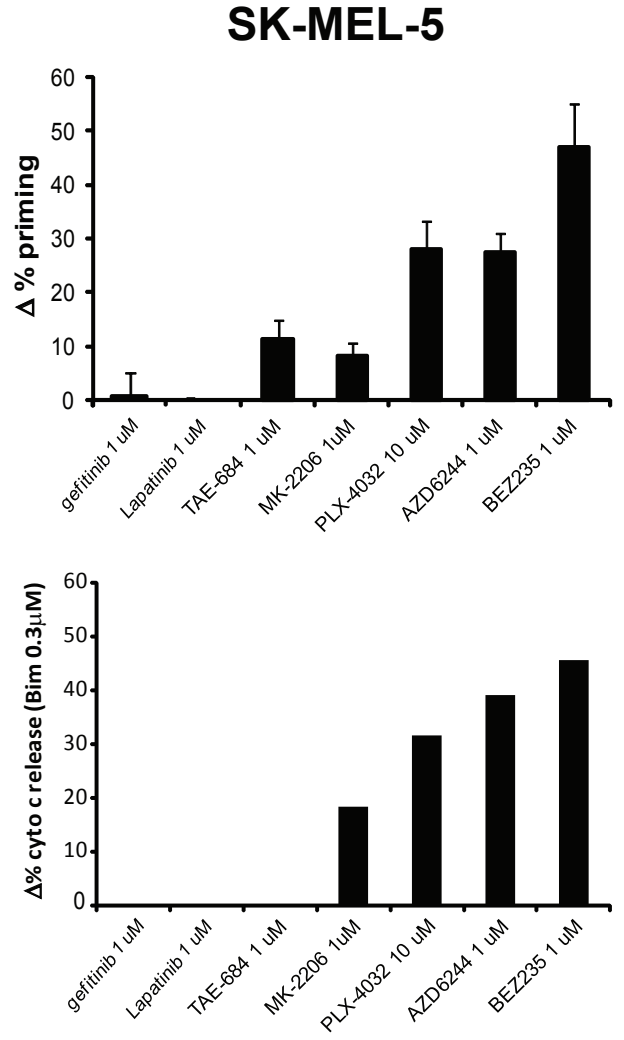

Supplement: NIHMS665124-supplement-4.pdf [file NIHMS665124-supplement-4.pdf]

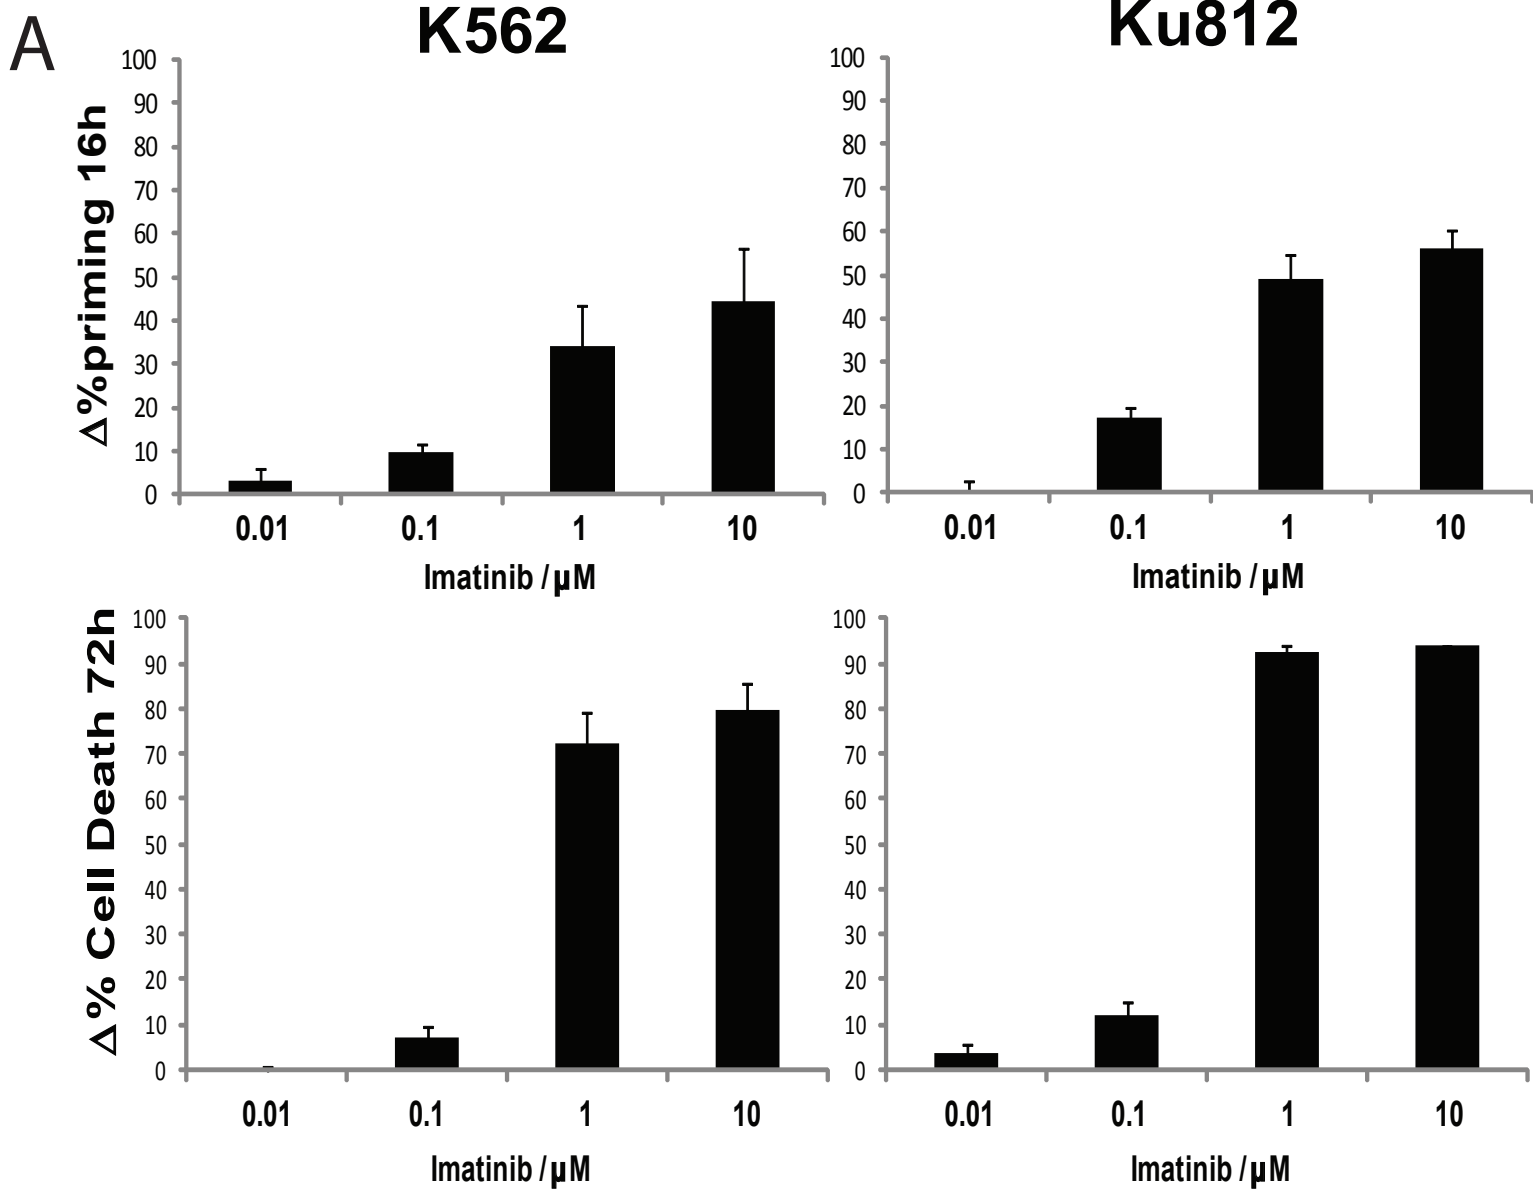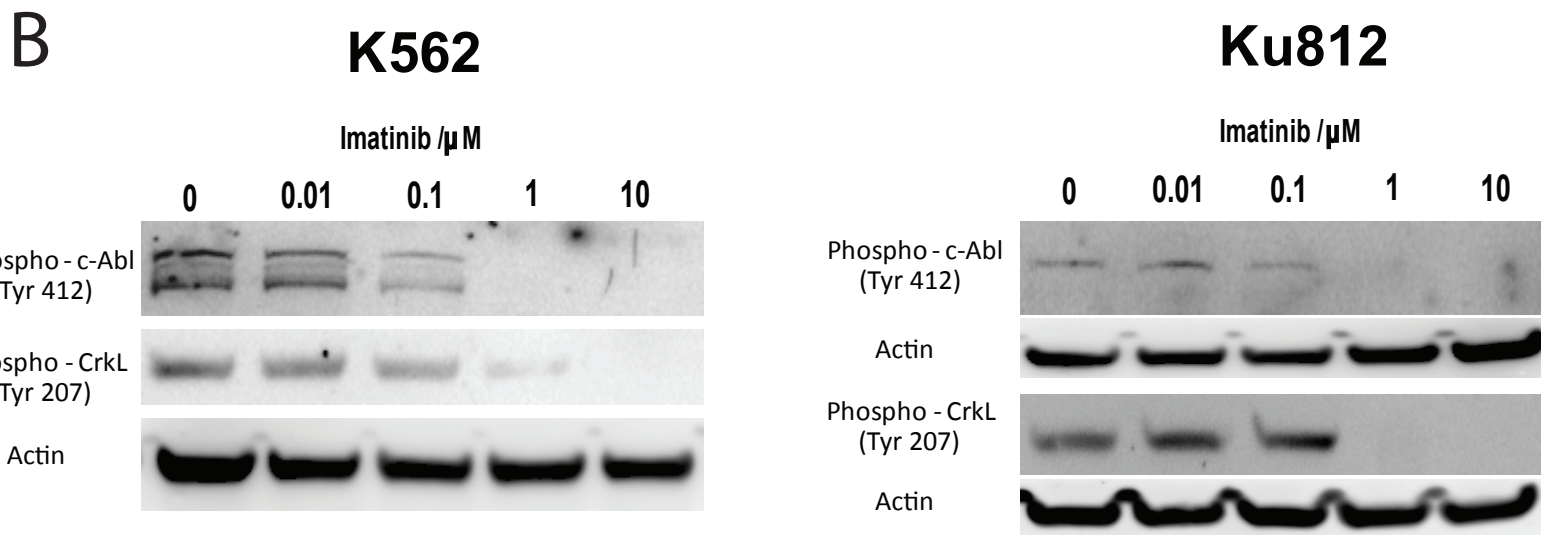

Supplement: NIHMS665124-supplement-5.pdf [file NIHMS665124-supplement-5.pdf]

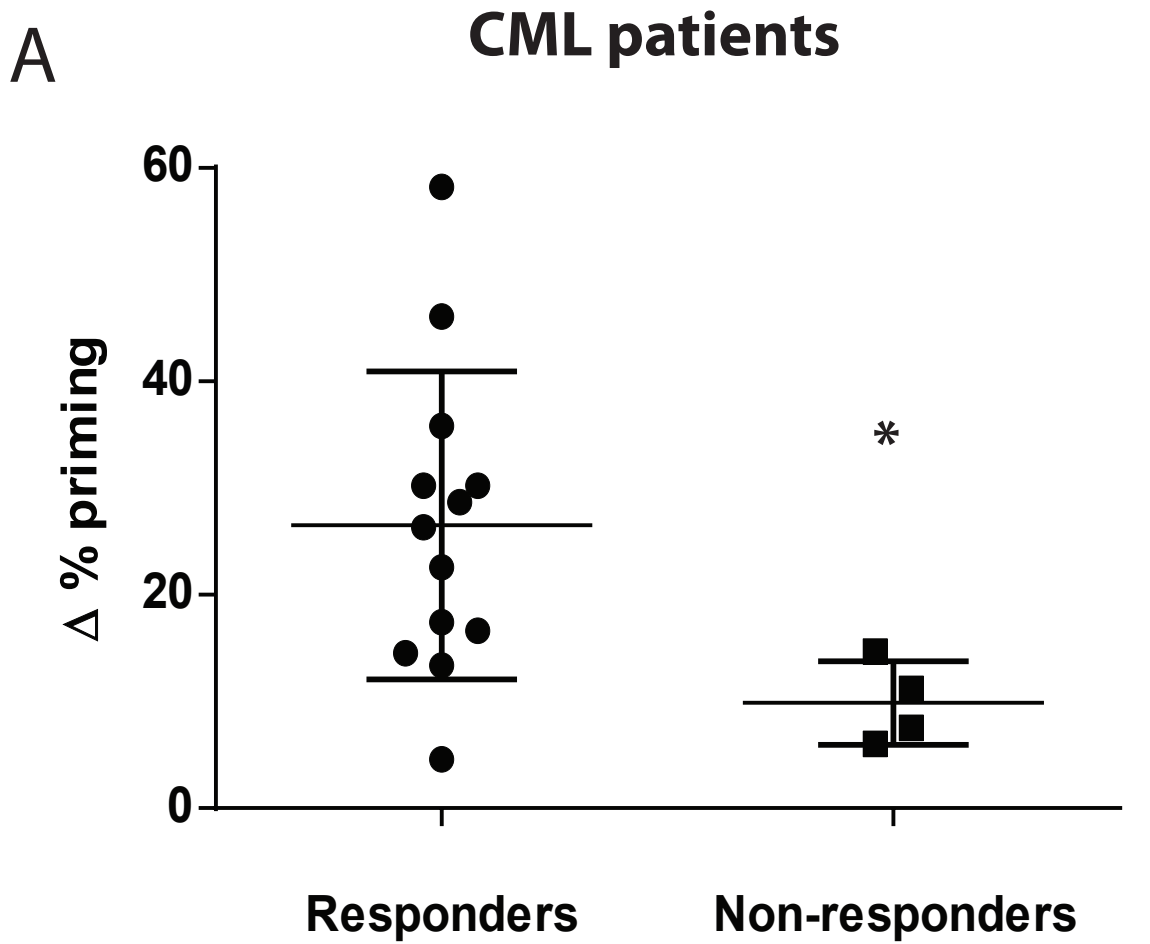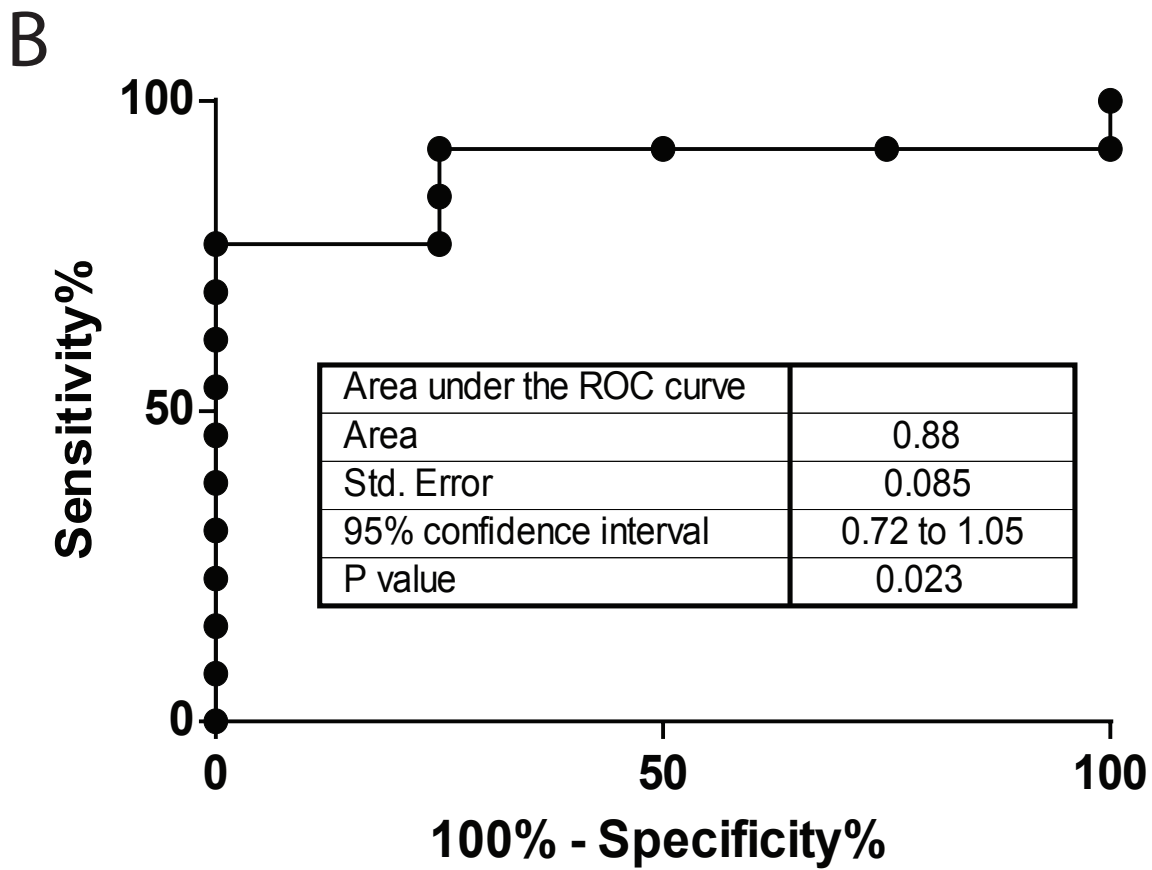

Supplement: NIHMS665124-supplement-6.pdf [file NIHMS665124-supplement-6.pdf]
